# Supplementary material for: Prioritizing benefits, costs, and contextual and individual factors in researchers’ adoption of generative artificial intelligence: a multi-criteria decision-making analysis
Source: PeerJ journal article supplement (doi:10.7717/peerj-cs.3417), 2026-01-16
Supplement: MAXQDA_files.xlsx [file MAXQDA_files.xlsx]

## Sheet: Project Information
Document groups:	0
Document sets	2
Text documents	0
PDF documents	29
Image documents	0
Table documents	0
Codes:	23
Coded segments:	2342
Code sets	0
Memos:	18
Document memos	0
In-document memos	0
Code memos	18
Document Variables	0
Code Variables	0
Internals links	0

## Sheet: Document System
Document System		#
Documents		2342
	A8	32
	A29	30
	A28	89
	A27	109
	A26	31
	A9	62
	A1	49
	A2	90
	A3	18
	A4	37
	A5	85
	A6	99
	A7	129
	A10	127
	A11	65
	A12	39
	A13	28
	A14	121
	A15	293
	A16	310
	A17	70
	A19	85
	A20	42
	A21	35
	A22	83
	A23	72
	A24	27
	A25	28
	A18	57

## Sheet: Code System
Code System				Frequency
Code System				2342
	Contextual & Individual			0
		Demographics (Age & Gender)		0
			Age	12
			Gender	7
		Innovativeness		10
		Self-Efficacy		28
		Facilitating Conditions		352
		Experience		33
		AI Literacy		34
		Social Influence		103
	Costs			0
		Job Security		8
		Effort Expectency		168
		Cognitive Risk		57
		Regulatory Concerns		30
		Performance Risk		318
		Ethical Concerns		556
	Benefits			0
		Knowledge Acquisition		71
		Hedonic Motivation		47
		Knowledge Sharing		51
		Accessibility		50
		Task Efficiency		407

## Sheet: Memos
Document group	Document name	Code	Document set	Title	Created by	Memo text	Origin	Beginning	End
		Task Efficiency		Task Efficiency	User	1. Time Savings - Reduced time spent on tasks - Streamlined workflows - Faster task completion 2. Effort Optimization - Reduced physical and mental exertion - Improved task prioritization - Minimized unnecessary work 3. Output Maximization - Increased quantity of work produced - Enhanced quality of deliverables - Improved overall productivity 4. Workload Management - Efficient task distribution -…	Code
		Effort Expectency		Effort Expectency	User	1. Simplicity - Easy to use - Straightforward interface - Intuitive navigation 2. Learnability - Quick to pick up - Minimal learning curve - Intuitive functionality 3. Seamlessness - Smooth experience - Effortless integration - Seamless transitions 4. Intuitiveness - Logical design - Self-explanatory features - Intuitive user experience	Code
		Knowledge Sharing		Knowledge Sharing	User	1. Global Academic Collaboration - AI can foster global scholarly collaboration and discourse by providing specialized linguistic support for non-native English-speaking scholars - AI can help elevate the quality of scholarly work through more detailed analyses - AI can play a role in improving international relations and facilitating interdisciplinary work across scientific fields 3. Collaborati…	Code
		Accessibility		Accessibility	User	1. Ubiquitous Accessibility - Availability of ChatGPT as a conversational chatbot - Widespread global dissemination and rapid rise in popularity 2. Multimodal Accessibility - Accessibility across various devices (computers, laptops, smartphones, tablets) - Inclusivity and support for diverse user needs 3. Informational Accessibility - Enabling constant accessibility to scientific information - Im…	Code
		Ethical Concerns		Ethical Concerns	User	1. Ethical Disclosure and Transparency - Clearly disclose the extent of AI assistance in scholarly articles - Communicate the role of AI in the research and writing process 2. Bias Mitigation and Inclusivity - Ensure AI-generated content remains free from bias - Align AI outputs with ethical standards of inclusivity and fairness 4. Researcher Accountability and Integrity - Uphold principles of tr…	Code
		Cognitive Risk		Cognitive Risk	User	1. Compromised Critical Thinking - Reduced ability to engage in deep, analytical reasoning - Overreliance on AI-generated content leading to uncritical acceptance of information - Potential decline in problem-solving and independent thinking skills 2. Biased and Inaccurate Information - Risk of researchers blindly trusting unreliable or biased AI-generated content - Lack of nuance and depth compa…	Code
		Regulatory Concerns		Regulatory Concerns	User	1. Regulatory Oversight - Discussions around the need for regulatory frameworks to govern the use of AI tools like ChatGPT in academic and research settings - Concerns about the lack of regulation and the potential risks associated with the uncontrolled use of these tools 2. Institutional Policies - Recommendations for universities and research institutions to develop their own policies and guide…	Code
		Performance Risk (+) (+) (+)		Performance Risk	User	1. Accuracy of AI-Generated Content - Concerns about the accuracy and reliability of ChatGPT's outputs, including occasional errors in factual accuracy, clarity, and scientific rigor - Need for rigorous verification of the quality and accuracy of generated outputs, especially for tasks requiring literary analysis or citation accuracy - Responsibility of human authors to ensure the accuracy and cr…	Code
		Social Influence (+) (+) (+)		Social Influence	User	1. Peer Influence - Connections and information sharing amongst peers play a huge role in the adoption of innovations in higher education - Peer influence further catalyzes network growth when early adopters collaborate to exert influence, though the impact is somewhat diminished within smaller groups - In a dense group, there is likely to be a higher level of social pressure to conform to the gr…	Code
		AI Literacy		AI Literacy	User	- Proficiency in using AI tools for swift analysis of unstructured qualitative data - Researchers' need to develop proficiency in AI tools while maintaining critical oversight - Importance of understanding the limitations and appropriate use of AI in research tasks Bridging the AI Literacy Gap - Addressing the knowledge gap in users' understanding and proficiency in utilizing AI chatbots - Develo…	Code
		Experience		Experience	User	PriorExposure - Familiarity with comparable technologies - Existing knowledge about the technology	Code
		Facilitating Conditions		Facilitating Conditions	User	1. Ethical and Regulatory Frameworks • Establish clear institutional guidelines and policies on the ethical use of AI tools in research and academia • Develop standardized citation and attribution protocols for AI contributions in research outputs • Implement AI-based plagiarism detection systems and provide training on responsible AI use 2. Training and Support • Offer comprehensive training pro…	Code
		Self-Efficacy		Self-Efficacy	User	Perceived Self-Efficacy - Individuals' beliefs in their capacity to execute a particular behavior - Confidence in one's ability to effectively respond to challenges - Crucial for academics in using Chat-GPT for academic purpose	Code
		Job Security		Job Security	User	AI-Driven Job Displacement Concerns - Anxieties about potential job loss - Worries about job replacement and automation	Code
		Hedonic Motivation		Hedonic Motivation	User	Enjoyment of Use Pleasure and Satisfaction Creative Fun Intrinsic Gratification	Code
		Knowledge Acquisition		Knowledge Acquisition	User	Multifaceted Knowledge Acquisition - Knowledge acquisition involves various aspects, such as conception, design, data acquisition, analysis, and interpretation. - The process also includes drafting, revising, and approving the final publication. Augmenting Research Capabilities Personalized and Interactive Learning - The advantages of ChatGPT include personalized learning, the encouragement of in…	Code
		Age		Age	User		Code
		Innovativeness		Innovativeness	User	- Personal innovativeness influences academics' GAI adoption and moderates related factors.	Code

## Sheet: Summaries
Document name	Code	Summary	Locations

## Sheet: Links
Document 1	Memo 1	Beginning 1	LinkID2	Document 2	Memo 2	Beginning 2	Preview 2	Document group 1	Document group 2

## Sheet: List of Document Variables
Variable	Variable type	To be displayed	Source	Missing value	Categorical	Favorite variable
Document group	Text	1	System		1	0
Document name	Text	1	System		1	0
Created by	Text	1	System		0	0
Created	Date/Time	1	System		0	0
Modified by	Text	1	System		0	0
Modified	Date/Time	1	System		0	0
Coded Segments	Integer	1	System		0	0
Memos	Integer	1	System		0	0
PDF Pages	Integer	1	System		0	0
Paragraphs	Integer	1	System		0	0
Sentences	Integer	1	System		0	0
Words	Integer	1	System		0	0
Characters	Integer	1	System		0	0

## Sheet: Data editor (document variables
Document group	Document name	Created	Coded Segments	Memos	Created by	PDF Pages	Paragraphs	Sentences	Words	Characters
	A8	5/26/2025 07:56:37	32	0	User	12	206	1014	10564	64598
	A29	5/24/2025 04:10:32	30	0	User	7	116	775	4091	31185
	A28	5/23/2025 09:01:06	89	0	User	16	206	1024	6914	46554
	A27	5/23/2025 09:01:06	109	0	User	16	335	2101	13492	90541
	A26	5/23/2025 09:01:07	31	0	User	5	90	357	3034	19647
	A9	5/18/2025 08:54:22	62	0	User	7	181	1177	5993	40861
	A1	5/18/2025 08:54:22	49	0	User	18	234	1350	11011	71370
	A2	5/18/2025 08:54:22	90	0	User	22	225	1463	10639	70526
	A3	5/18/2025 08:54:22	18	0	User	22	193	1523	11999	78770
	A4	5/18/2025 08:54:23	37	0	User	18	262	1204	10165	67192
	A5	5/18/2025 08:54:23	85	0	User	21	340	1942	10490	67422
	A6	5/18/2025 08:54:23	99	0	User	12	142	898	7520	49186
	A7	5/18/2025 08:54:24	129	0	User	28	472	1959	14085	94208
	A10	5/18/2025 08:54:24	127	0	User	14	437	1885	12960	82660
	A11	5/18/2025 08:54:25	65	0	User	16	239	937	6958	46109
	A12	5/18/2025 08:54:25	39	0	User	6	83	493	4049	26772
	A13	5/18/2025 08:54:25	28	0	User	6	79	389	3082	19960
	A14	5/18/2025 08:54:25	121	0	User	16	197	1012	7892	55855
	A15	5/18/2025 08:54:26	293	0	User	32	619	3803	26027	167560
	A16	5/18/2025 08:54:27	310	0	User	23	348	1346	11917	80412
	A17	5/18/2025 08:54:27	70	0	User	18	232	1290	10588	67557
	A19	5/18/2025 08:54:28	85	0	User	13	136	1042	7553	51492
	A20	5/18/2025 08:54:28	42	0	User	29	254	1507	6337	45558
	A21	5/18/2025 08:54:28	35	0	User	9	201	762	5237	33568
	A22	5/18/2025 08:54:28	83	0	User	23	256	1956	12138	77250
	A23	5/18/2025 08:54:29	72	0	User	40	941	1587	11258	70605
	A24	5/18/2025 08:54:29	27	0	User	7	99	468	3739	22815
	A25	5/18/2025 08:54:29	28	0	User	11	150	589	4775	30441
	A18	5/18/2025 08:54:27	57	0	User	14	418	1641	12367	75993

## Sheet: List of Code Variables
Variable	Variable type	To be displayed	Source	Missing value	Categorical
Parent code	Text	1	System		1
Code	Text	1	System		0
Cod. seg. (all documents)	Integer	1	System		0
Cod. seg. (activ. documents)	Integer	1	System		0
Created by	Text	1	System		0
Created	Date/Time	1	System		0
Code alias	Text	1	System		0
Contributions	Integer	1	System		0
Characters	Integer	1	System		0
Modified by	Text	1	System		0
Modified	Date/Time	1	System		0
% Cod. seg. (all documents)	Decimal	1	System		0
% Cod. seg. (activ. documents)	Decimal	1	System		0
Documents	Integer	1	System		0

## Sheet: Data editor (code variables)
Color	Code	Cod. seg. (all documents)	Cod. seg. (activ. documents)	Created by	Created	Code alias	EmojiID	% Cod. seg. (all documents)	% Cod. seg. (activ. documents)	Documents
●	Contextual & Individual	0	0	User	5/18/2025 08:57:14			0	0	0
●	Job Security	8	0	User	5/22/2025 08:52:43			0	0	0
●	Knowledge Acquisition	71	0	User	5/24/2025 07:06:19			0	0	0
●	Age	12	0	User	5/28/2025 08:30:37			0	0	0
●	Demographics (Age & Gender)	0	0	User	5/28/2025 09:21:15			0	0	0
●	Costs	0	0	User	5/18/2025 08:57:07			0	0	0
●	Effort Expectency	168	0	User	5/18/2025 08:58:55			0	0	0
●	Hedonic Motivation	47	0	User	5/22/2025 09:03:50			0	0	0
●	Innovativeness	10	0	User	5/26/2025 07:25:16			0	0	0
●	Gender	7	0	User	5/28/2025 08:30:43			0	0	0
●	Benefits	0	0	User	5/18/2025 08:56:58			0	0	0
●	Knowledge Sharing	51	0	User	5/18/2025 08:59:27			0	0	0
●	Cognitive Risk	57	0	User	5/21/2025 09:56:32			0	0	0
●	Self-Efficacy	28	0	User	5/23/2025 02:26:40			0	0	0
●	Accessibility	50	0	User	5/18/2025 08:59:16			0	0	0
●	Regulatory Concerns	30	0	User	5/21/2025 09:52:27			0	0	0
●	Facilitating Conditions	352	0	User	5/22/2025 09:23:08			0	0	0
●	Task Efficiency	407	0	User	5/18/2025 08:57:47			0	0	0
●	Performance Risk (+) (+) (+)	318	0	User	5/21/2025 09:48:30			0	0	0
●	Experience	33	0	User	5/21/2025 09:55:41			0	0	0
●	Ethical Concerns	556	0	User	5/21/2025 09:45:12			0	0	0
●	AI Literacy	34	0	User	5/21/2025 09:55:33			0	0	0
●	Social Influence (+) (+) (+)	103	0	User	5/21/2025 09:55:17			0	0	0
