# Supplementary material for: Prioritizing benefits, costs, and contextual and individual factors in researchers’ adoption of generative artificial intelligence: a multi-criteria decision-making analysis
Source: PeerJ journal article supplement (doi:10.7717/peerj-cs.3417), 2026-01-16
Supplement: Raw_Data_File_.xlsx [file Raw_Data_File_.xlsx]

## Sheet: Sheet1
ID	Start time	Completion time	Language	Gender:	Age:	Work Experience in academic domain:	Discipline	Education Level:	GAI Usage Experience in Research Tasks	What type of subscription plan do you use for generative AI tools in your research?	How many published works do you currently have in peer-reviewed journals or academic conferences?	Social Pressure and Influence : Refers to the impact of peers or societal and cultural norms on the decision to adopt GAI.	Self-Efficacy: Researcher’s belief in his/her ability to successfully use GAI to accomplish academic research tasks.	Innovativeness: Refers to an individual's tendency to adopt and experiment new technologies.	AI Literacy: Refers to researchers’ proficiency in using GAI to achieve desired outcomes.	Performance Risk: Refers to concerns about the ability of GAI to perform academic research tasks reliably and fairly.	Ethical Concerns: Refers to concerns regarding AI model transparency, data privacy, embedded biases, and potential misuse impacting academic integrity when using GAI tools in academic research.	Effort Expectancy: Refers to the degree of ease associated with using GAI for the tasks of academic research process.	Job Security: Refers to the concerns researchers might have about the potential impact of GAI on their employment stability.	Facilitating Conditions: Refers to the availability of resources, infrastructure, and technical support that enable researchers to effectively use GAI such as training and institutional support.	Knowledge Acquisition: Refers to the process by which researchers obtain new information and progressively enhance their understanding as they interact with GAI tools.	Task Efficiency: Refers to the ability of GAI tools to help researchers complete specific tasks more quickly and with fewer resource.	Accessibility: Refers to the ease in which researchers can access and retrieve information using GAI.	Hedonic Motivation: Refers to the researchers’ enjoyment when using GAI.	Knowledge Sharing: Refers to the process of using GAI to distribute, exchange, and communicate knowledge among researchers.	Cognitive Risk: Refers to the concerns researchers have about overly relying on GAI tools in academic research, weakening their independent reasoning, creativity, or critical-thinking capabilities.	Experience: Refers to the prior knowledge and familiarity researchers have with GAI tools.	Regulatory Concerns: Refers to the concerns about the absence of or compliance with laws and regulations, such as copyright and intellectual property when using GAI for academic research.
1	2025-04-10 09:10:08	2025-04-10 09:23:08	English (United States)‎	Male	43-48	11-16 years	Science, Technology, Engineering, and Mathematics	PhD	1-2 years	Paid	12-17	Important	Moderately Important	Moderately Important	Important	Highly Important	Highly Important	Important	Slightly Important	Highly Important	Important	Highly Important	Highly Important	Moderately Important	Highly Important	Important	Moderately Important	Slightly Important
2	2025-04-10 12:51:45	2025-04-10 13:08:55	English (United States)‎	Male	31-36	5-10 years	Business	Bachelor's	Less than 1 year	Free	Less than 5	Slightly Important	Important	Important	Important	Important	Important	Important	Not Important	Highly Important	Highly Important	Highly Important	Not Important	Not Important	Not Important	Not Important	Important	Not Important
3	2025-04-10 15:16:56	2025-04-10 15:32:40	English (United States)‎	Female	37-42	More than 16 years	Social Sciences & Humanities	Master’s	Less than 1 year	Free	Less than 5	Important	Slightly Important	Highly Important	Moderately Important	Highly Important	Highly Important	Important	Slightly Important	Slightly Important	Not Important	Moderately Important	Highly Important	Highly Important	Important	Highly Important	Moderately Important	Highly Important
4	2025-04-10 17:07:27	2025-04-10 17:19:23	English (United States)‎	Male	37-42	5-10 years	Science, Technology, Engineering, and Mathematics	Master’s	Less than 1 year	Free	Less than 5	Highly Important	Highly Important	Highly Important	Important	Moderately Important	Highly Important	Highly Important	Important	Highly Important	Highly Important	Important	Highly Important	Moderately Important	Highly Important	Highly Important	Highly Important	Highly Important
5	2025-04-10 18:01:58	2025-04-10 18:20:27	English (United States)‎	Female	>49	More than 16 years	Science, Technology, Engineering, and Mathematics	PhD	None	Free	6-11	Important	Highly Important	Highly Important	Highly Important	Moderately Important	Important	Highly Important	Important	Highly Important	Highly Important	Important	Highly Important	Moderately Important	Highly Important	Highly Important	Highly Important	Highly Important
6	2025-04-10 18:30:51	2025-04-10 18:46:13	English (United States)‎	Female	43-48	More than 16 years	Social Sciences & Humanities	PhD	Less than 1 year	Free	Less than 5	Slightly Important	Slightly Important	Moderately Important	Moderately Important	Moderately Important	Highly Important	Moderately Important	Highly Important	Highly Important	Moderately Important	Important	Moderately Important	Not Important	Not Important	Slightly Important	Important	Highly Important
7	2025-04-10 19:08:28	2025-04-10 19:28:05	English (United States)‎	Male	43-48	More than 16 years	Science, Technology, Engineering, and Mathematics	Master’s	Less than 1 year	Free	Less than 5	Slightly Important	Important	Highly Important	Important	Highly Important	Highly Important	Highly Important	Highly Important	Highly Important	Important	Highly Important	Important	Highly Important	Moderately Important	Highly Important	Highly Important	Highly Important
8	2025-04-10 20:57:13	2025-04-10 21:14:54	English (United States)‎	Male	43-48	More than 16 years	Science, Technology, Engineering, and Mathematics	PhD	Less than 1 year	Free	6-11	Slightly Important	Moderately Important	Moderately Important	Moderately Important	Moderately Important	Important	Important	Not Important	Slightly Important	Important	Important	Important	Important	Moderately Important	Important	Moderately Important	Highly Important
9	2025-04-11 09:31:07	2025-04-11 09:46:03	English (United States)‎	Male	43-48	More than 16 years	Science, Technology, Engineering, and Mathematics	PhD	Less than 1 year	Free	More than 17	Slightly Important	Highly Important	Highly Important	Highly Important	Highly Important	Highly Important	Important	Highly Important	Highly Important	Highly Important	Highly Important	Important	Important	Moderately Important	Important	Important	Highly Important
10	2025-04-11 10:14:24	2025-04-11 10:29:37	English (United States)‎	Female	37-42	11-16 years	Social Sciences & Humanities	PhD	1-2 years	Paid	6-11	Important	Moderately Important	Important	Highly Important	Highly Important	Highly Important	Slightly Important	Not Important	Important	Moderately Important	Important	Important	Not Important	Highly Important	Highly Important	Moderately Important	Moderately Important
11	2025-04-11 10:54:55	2025-04-11 11:10:09	English (United States)‎	Female	>49	More than 16 years	Social Sciences & Humanities	Master’s	Less than 1 year	Paid	Less than 5	Highly Important	Highly Important	Highly Important	Highly Important	Highly Important	Important	Highly Important	Important	Highly Important	Highly Important	Highly Important	Highly Important	Highly Important	Highly Important	Highly Important	Highly Important	Highly Important
12	2025-04-11 11:26:28	2025-04-11 11:44:32	English (United States)‎	Male	>49	5-10 years	Social Sciences & Humanities	PhD	None	Free	6-11	Highly Important	Moderately Important	Moderately Important	Highly Important	Highly Important	Important	Highly Important	Important	Highly Important	Highly Important	Highly Important	Highly Important	Highly Important	Highly Important	Highly Important	Highly Important	Highly Important
13	2025-04-11 11:45:54	2025-04-11 12:00:36	English (United States)‎	Male	43-48	Less than 5 years	Business	PhD	Less than 1 year	Paid	Less than 5	Highly Important	Highly Important	Important	Highly Important	Highly Important	Highly Important	Highly Important	Highly Important	Highly Important	Highly Important	Highly Important	Highly Important	Important	Highly Important	Highly Important	Highly Important	Highly Important
14	2025-04-11 14:23:55	2025-04-11 14:39:55	English (United States)‎	Female	43-48	More than 16 years	Science, Technology, Engineering, and Mathematics	Master’s	1-2 years	Free	6-11	Important	Important	Important	Highly Important	Highly Important	Important	Highly Important	Slightly Important	Highly Important	Moderately Important	Highly Important	Highly Important	Moderately Important	Slightly Important	Important	Important	Important
15	2025-04-11 15:55:53	2025-04-11 16:12:37	English (United States)‎	Female	31-36	5-10 years	Business	PhD	More than 2 years	Paid	Less than 5	Important	Important	Important	Highly Important	Important	Important	Important	Highly Important	Important	Important	Important	Important	Important	Important	Moderately Important	Important	Important
16	2025-04-11 18:30:40	2025-04-11 18:47:03	English (United States)‎	Male	>49	5-10 years	Science, Technology, Engineering, and Mathematics	Bachelor's	More than 2 years	Free	Less than 5	Moderately Important	Important	Moderately Important	Important	Moderately Important	Important	Moderately Important	Moderately Important	Important	Important	Moderately Important	Important	Moderately Important	Moderately Important	Moderately Important	Moderately Important	Moderately Important
17	2025-04-11 19:08:40	2025-04-11 19:21:02	English (United States)‎	Female	43-48	More than 16 years	Science, Technology, Engineering, and Mathematics	PhD	None	Free	6-11	Important	Important	Highly Important	Moderately Important	Highly Important	Highly Important	Moderately Important	Highly Important	Important	Important	Highly Important	Important	Important	Highly Important	Highly Important	Highly Important	Highly Important
18	2025-04-11 19:25:05	2025-04-11 19:38:07	English (United States)‎	Male	>49	More than 16 years	Science, Technology, Engineering, and Mathematics	PhD	More than 2 years	Free	More than 17	Important	Important	Important	Important	Important	Important	Important	Important	Important	Important	Important	Important	Important	Important	Important	Important	Highly Important
19	2025-04-12 09:30:20	2025-04-12 09:43:38	English (United States)‎	Male	43-48	More than 16 years	Science, Technology, Engineering, and Mathematics	PhD	1-2 years	Free	Less than 5	Highly Important	Important	Highly Important	Important	Highly Important	Highly Important	Highly Important	Highly Important	Important	Important	Highly Important	Highly Important	Important	Highly Important	Highly Important	Highly Important	Highly Important
20	2025-04-12 10:10:39	2025-04-12 10:24:49	English (United States)‎	Male	37-42	11-16 years	Business	PhD	1-2 years	Paid	Less than 5	Moderately Important	Moderately Important	Moderately Important	Highly Important	Important	Important	Highly Important	Moderately Important	Important	Moderately Important	Moderately Important	Slightly Important	Moderately Important	Moderately Important	Moderately Important	Moderately Important	Important
21	2025-04-12 11:32:03	2025-04-12 11:47:09	English (United States)‎	Female	43-48	More than 16 years	Science, Technology, Engineering, and Mathematics	PhD	1-2 years	Paid	6-11	Highly Important	Moderately Important	Slightly Important	Moderately Important	Highly Important	Highly Important	Important	Slightly Important	Highly Important	Important	Highly Important	Highly Important	Not Important	Highly Important	Highly Important	Important	Moderately Important
22	2025-04-12 13:08:02	2025-04-12 13:23:42	English (United States)‎	Male	31-36	5-10 years	Business	Master’s	None	Free	Less than 5	Important	Highly Important	Important	Highly Important	Highly Important	Important	Important	Important	Important	Important	Moderately Important	Important	Important	Important	Moderately Important	Important	Important
23	2025-04-12 13:36:31	2025-04-12 13:49:34	English (United States)‎	Female	43-48	5-10 years	Business	PhD	1-2 years	Free	6-11	Not Important	Not Important	Highly Important	Not Important	Not Important	Highly Important	Slightly Important	Highly Important	Slightly Important	Moderately Important	Moderately Important	Important	Moderately Important	Not Important	Moderately Important	Moderately Important	Highly Important
24	2025-04-12 13:53:52	2025-04-12 14:11:33	English (United States)‎	Male	31-36	Less than 5 years	Science, Technology, Engineering, and Mathematics	Master’s	Less than 1 year	Free	Less than 5	Not Important	Slightly Important	Moderately Important	Not Important	Not Important	Moderately Important	Slightly Important	Slightly Important	Moderately Important	Moderately Important	Moderately Important	Slightly Important	Moderately Important	Moderately Important	Slightly Important	Moderately Important	Moderately Important
25	2025-04-12 14:53:17	2025-04-12 15:07:53	English (United States)‎	Male	37-42	5-10 years	Business	PhD	None	Free	Less than 5	Highly Important	Highly Important	Moderately Important	Important	Important	Important	Important	Not Important	Highly Important	Important	Important	Important	Slightly Important	Important	Important	Moderately Important	Moderately Important
26	2025-04-12 15:27:24	2025-04-12 15:44:42	English (United States)‎	Male	43-48	5-10 years	Science, Technology, Engineering, and Mathematics	Master’s	1-2 years	Free	Less than 5	Important	Moderately Important	Moderately Important	Highly Important	Slightly Important	Slightly Important	Moderately Important	Slightly Important	Important	Highly Important	Highly Important	Highly Important	Important	Slightly Important	Slightly Important	Slightly Important	Not Important
27	2025-04-12 16:41:55	2025-04-12 16:57:03	English (United States)‎	Female	43-48	More than 16 years	Science, Technology, Engineering, and Mathematics	PhD	1-2 years	Free	Less than 5	Slightly Important	Important	Highly Important	Highly Important	Slightly Important	Important	Highly Important	Moderately Important	Important	Important	Highly Important	Slightly Important	Slightly Important	Not Important	Slightly Important	Moderately Important	Highly Important
28	2025-04-12 18:22:42	2025-04-12 18:37:55	English (United States)‎	Female	>49	More than 16 years	Science, Technology, Engineering, and Mathematics	Master’s	None	Free	6-11	Important	Slightly Important	Moderately Important	Important	Highly Important	Highly Important	Slightly Important	Slightly Important	Important	Important	Highly Important	Important	Slightly Important	Important	Important	Moderately Important	Moderately Important
29	2025-04-12 18:51:24	2025-04-12 19:05:58	English (United States)‎	Male	31-36	5-10 years	Business	PhD	1-2 years	Free	Less than 5	Important	Important	Moderately Important	Important	Moderately Important	Moderately Important	Slightly Important	Moderately Important	Moderately Important	Moderately Important	Important	Important	Moderately Important	Important	Moderately Important	Moderately Important	Important
30	2025-04-12 19:46:48	2025-04-12 20:00:13	English (United States)‎	Female	37-42	5-10 years	Arts & Design	PhD	1-2 years	Free	12-17	Highly Important	Moderately Important	Moderately Important	Moderately Important	Highly Important	Highly Important	Important	Moderately Important	Highly Important	Highly Important	Important	Highly Important	Moderately Important	Highly Important	Highly Important	Moderately Important	Moderately Important
31	2025-04-12 20:51:07	2025-04-12 21:02:19	English (United States)‎	Female	43-48	11-16 years	Business	PhD	None	Free	Less than 5	Moderately Important	Moderately Important	Moderately Important	Highly Important	Highly Important	Highly Important	Important	Slightly Important	Important	Important	Highly Important	Important	Slightly Important	Important	Important	Moderately Important	Moderately Important
32	2025-04-13 09:01:38	2025-04-13 09:19:18	English (United States)‎	Female	43-48	More than 16 years	Science, Technology, Engineering, and Mathematics	Master’s	1-2 years	Free	6-11	Highly Important	Moderately Important	Moderately Important	Moderately Important	Highly Important	Highly Important	Highly Important	Slightly Important	Highly Important	Important	Important	Highly Important	Moderately Important	Highly Important	Important	Moderately Important	Moderately Important
33	2025-04-13 09:04:46	2025-04-13 09:19:58	English (United States)‎	Male	37-42	11-16 years	Business	Bachelor's	Less than 1 year	Paid	Less than 5	Highly Important	Highly Important	Highly Important	Highly Important	Highly Important	Highly Important	Highly Important	Highly Important	Highly Important	Highly Important	Highly Important	Highly Important	Highly Important	Highly Important	Highly Important	Highly Important	Highly Important
34	2025-04-13 09:54:15	2025-04-13 10:08:03	English (United States)‎	Female	37-42	5-10 years	Science, Technology, Engineering, and Mathematics	Bachelor's	None	Free	6-11	Important	Moderately Important	Moderately Important	Important	Highly Important	Highly Important	Moderately Important	Slightly Important	Important	Important	Highly Important	Important	Slightly Important	Important	Important	Moderately Important	Moderately Important
35	2025-04-13 10:23:02	2025-04-13 10:41:29	English (United States)‎	Female	>49	More than 16 years	Business	PhD	Less than 1 year	Paid	6-11	Not Important	Important	Important	Highly Important	Important	Highly Important	Important	Important	Slightly Important	Highly Important	Highly Important	Important	Important	Slightly Important	Highly Important	Important	Highly Important
36	2025-04-13 11:27:48	2025-04-13 11:39:36	English (United States)‎	Female	>49	More than 16 years	Social Sciences & Humanities	PhD	1-2 years	Free	Less than 5	Highly Important	Moderately Important	Slightly Important	Moderately Important	Highly Important	Highly Important	Highly Important	Moderately Important	Highly Important	Important	Highly Important	Highly Important	Slightly Important	Highly Important	Important	Slightly Important	Slightly Important
37	2025-04-13 11:35:34	2025-04-13 11:45:11	English (United States)‎	Male	43-48	More than 16 years	Science, Technology, Engineering, and Mathematics	PhD	More than 2 years	Free	12-17	Highly Important	Moderately Important	Moderately Important	Important	Highly Important	Highly Important	Highly Important	Slightly Important	Highly Important	Important	Important	Highly Important	Not Important	Highly Important	Highly Important	Moderately Important	Moderately Important
38	2025-04-13 12:41:42	2025-04-13 12:53:45	English (United States)‎	Male	>49	More than 16 years	Arts & Design	Master’s	1-2 years	Paid	6-11	Highly Important	Slightly Important	Slightly Important	Important	Highly Important	Highly Important	Important	Not Important	Important	Important	Highly Important	Important	Slightly Important	Important	Important	Moderately Important	Moderately Important
39	2025-04-13 15:27:00	2025-04-13 15:43:16	English (United States)‎	Male	43-48	More than 16 years	Science, Technology, Engineering, and Mathematics	PhD	1-2 years	Free	Less than 5	Highly Important	Not Important	Slightly Important	Moderately Important	Highly Important	Highly Important	Highly Important	Not Important	Highly Important	Highly Important	Highly Important	Highly Important	Not Important	Highly Important	Highly Important	Not Important	Highly Important
40	2025-04-13 16:54:42	2025-04-13 17:08:36	English (United States)‎	Female	43-48	More than 16 years	Science, Technology, Engineering, and Mathematics	Master’s	1-2 years	Paid	6-11	Highly Important	Highly Important	Highly Important	Highly Important	Highly Important	Highly Important	Highly Important	Highly Important	Highly Important	Highly Important	Highly Important	Highly Important	Important	Moderately Important	Highly Important	Important	Highly Important
41	2025-04-13 17:17:57	2025-04-13 17:33:13	English (United States)‎	Male	31-36	5-10 years	Arts & Design	PhD	None	Free	Less than 5	Highly Important	Moderately Important	Moderately Important	Important	Important	Important	Important	Not Important	Important	Important	Highly Important	Important	Slightly Important	Important	Important	Moderately Important	Moderately Important
42	2025-04-13 18:16:45	2025-04-13 18:28:57	English (United States)‎	Female	43-48	More than 16 years	Social Sciences & Humanities	Master’s	More than 2 years	Paid	6-11	Slightly Important	Slightly Important	Important	Slightly Important	Slightly Important	Important	Slightly Important	Moderately Important	Moderately Important	Important	Moderately Important	Moderately Important	Moderately Important	Moderately Important	Moderately Important	Slightly Important	Important
43	2025-04-13 18:26:01	2025-04-13 18:42:53	English (United States)‎	Male	>49	More than 16 years	Business	PhD	1-2 years	Free	6-11	Important	Important	Important	Important	Highly Important	Highly Important	Moderately Important	Important	Important	Important	Important	Important	Moderately Important	Important	Important	Important	Highly Important
44	2025-04-13 19:08:58	2025-04-13 19:27:22	English (United States)‎	Female	37-42	11-16 years	Business	PhD	More than 2 years	Paid	Less than 5	Important	Important	Highly Important	Highly Important	Highly Important	Slightly Important	Slightly Important	Important	Moderately Important	Moderately Important	Slightly Important	Not Important	Not Important	Slightly Important	Important	Important	Important
45	2025-04-13 20:29:12	2025-04-13 20:44:40	English (United States)‎	Male	43-48	5-10 years	Business	Master’s	Less than 1 year	Free	Less than 5	Moderately Important	Moderately Important	Moderately Important	Important	Moderately Important	Slightly Important	Moderately Important	Slightly Important	Important	Slightly Important	Important	Important	Important	Slightly Important	Slightly Important	Important	Slightly Important
46	2025-04-13 21:23:50	2025-04-13 21:36:16	English (United States)‎	Male	37-42	Less than 5 years	Business	Bachelor's	Less than 1 year	Paid	Less than 5	Moderately Important	Important	Highly Important	Moderately Important	Highly Important	Important	Highly Important	Slightly Important	Moderately Important	Highly Important	Important	Highly Important	Important	Important	Important	Important	Highly Important
47	2025-04-13 21:32:13	2025-04-13 21:49:44	English (United States)‎	Female	43-48	11-16 years	Science, Technology, Engineering, and Mathematics	Master’s	None	Free	Less than 5	Slightly Important	Moderately Important	Important	Important	Highly Important	Highly Important	Slightly Important	Not Important	Important	Important	Highly Important	Important	Slightly Important	Important	Important	Moderately Important	Moderately Important
48	2025-04-13 21:45:56	2025-04-13 22:01:04	English (United States)‎	Female	37-42	5-10 years	Business	Master’s	1-2 years	Free	Less than 5	Highly Important	Moderately Important	Moderately Important	Moderately Important	Highly Important	Highly Important	Important	Slightly Important	Highly Important	Important	Important	Important	Slightly Important	Highly Important	Important		Moderately Important
49	2025-04-14 09:40:41	2025-04-14 09:56:54	English (United States)‎	Male	43-48	11-16 years	Arts & Design	PhD	1-2 years	Free	6-11	Highly Important	Important	Moderately Important	Highly Important	Highly Important	Highly Important	Important	Moderately Important	Important	Highly Important	Important	Important	Slightly Important	Important	Important	Slightly Important	Moderately Important
50	2025-04-14 10:02:25	2025-04-14 10:14:15	English (United States)‎	Male	>49	More than 16 years	Arts & Design	Master’s	None	Free	6-11	Highly Important	Slightly Important	Slightly Important	Important	Important	Highly Important	Important	Not Important	Moderately Important	Moderately Important	Highly Important	Important	Slightly Important	Important	Important	Moderately Important	Moderately Important
51	2025-04-14 13:13:13	2025-04-14 13:32:33	English (United States)‎	Female	31-36	5-10 years	Arts & Design	Master’s	1-2 years	Paid	Less than 5	Important	Not Important	Slightly Important	Important	Important	Highly Important	Moderately Important	Slightly Important	Important	Important	Important	Important	Slightly Important	Important	Highly Important	Slightly Important	Moderately Important
52	2025-04-14 13:46:50	2025-04-14 14:01:23	English (United States)‎	Female	37-42	5-10 years	Business	Master’s	1-2 years	Free	Less than 5	Highly Important	Not Important	Important	Important	Highly Important	Highly Important	Moderately Important	Not Important	Important	Highly Important	Important	Important	Slightly Important	Important	Important	Not Important	Important
53	2025-04-14 16:39:49	2025-04-14 16:56:26	English (United States)‎	Male	43-48	11-16 years	Business	PhD	1-2 years	Free	6-11	Important	Not Important	Moderately Important	Highly Important	Highly Important	Highly Important	Important	Slightly Important	Highly Important	Highly Important	Highly Important	Highly Important	Slightly Important	Important	Highly Important	Highly Important	Slightly Important
54	2025-04-14 18:27:08	2025-04-14 18:38:30	English (United States)‎	Male	43-48	5-10 years	Business	PhD	1-2 years	Free	6-11	Important	Not Important	Moderately Important	Highly Important	Highly Important	Highly Important	Moderately Important	Slightly Important	Highly Important	Highly Important	Important	Highly Important	Slightly Important	Highly Important	Important	Slightly Important	Moderately Important
55	2025-04-14 19:24:45	2025-04-14 19:44:45	English (United States)‎	Female	37-42	11-16 years	Business	PhD	1-2 years	Paid	6-11	Important	Slightly Important	Moderately Important	Highly Important	Highly Important	Highly Important	Important	Not Important	Highly Important	Important	Highly Important	Highly Important	Slightly Important	Important	Important	Slightly Important	Moderately Important
56	2025-04-14 19:42:19	2025-04-14 19:53:16	English (United States)‎	Male	31-36	5-10 years	Arts & Design	Master’s	1-2 years	Paid	6-11	Highly Important	Slightly Important	Slightly Important	Highly Important	Highly Important	Highly Important	Important	Not Important	Highly Important	Highly Important	Highly Important	Important	Not Important	Highly Important	Highly Important	Not Important	Moderately Important
57	2025-04-14 20:43:52	2025-04-14 20:59:32	English (United States)‎	Male	>49	More than 16 years	Social Sciences & Humanities	PhD	1-2 years	Paid	12-17	Highly Important	Not Important	Moderately Important	Highly Important	Highly Important	Highly Important	Highly Important	Not Important	Highly Important	Highly Important	Highly Important	Not Important	Not Important	Highly Important	Highly Important	Not Important	Highly Important
58	2025-04-14 21:35:56	2025-04-14 21:46:12	English (United States)‎	Female	37-42	11-16 years	Business	PhD	1-2 years		6-11	Highly Important	Not Important	Not Important	Highly Important	Highly Important	Highly Important	Highly Important	Not Important	Highly Important	Highly Important	Highly Important	Not Important	Not Important	Highly Important	Highly Important	Not Important	Highly Important
59	2025-04-15 09:19:02	2025-04-15 09:35:16	English (United States)‎	Female	>49	More than 16 years	Social Sciences & Humanities	PhD	1-2 years	Free	12-17	Highly Important	Not Important	Slightly Important	Highly Important	Highly Important	Highly Important	Highly Important	Not Important	Highly Important	Highly Important	Highly Important	Not Important	Not Important	Highly Important	Important	Not Important	Highly Important
60	2025-04-15 09:30:37	2025-04-15 09:48:44	English (United States)‎	Female	31-36	5-10 years	Social Sciences & Humanities	Master’s	1-2 years	Free	Less than 5	Highly Important	Not Important	Not Important	Highly Important	Highly Important	Highly Important	Important	Not Important	Highly Important	Highly Important	Highly Important	Important	Not Important	Highly Important	Highly Important	Not Important	Highly Important
61	2025-04-15 13:28:49	2025-04-15 13:42:12	English (United States)‎	Male	43-48	11-16 years	Business	PhD	1-2 years	Paid	Less than 5	Highly Important	Slightly Important	Not Important	Highly Important	Highly Important	Highly Important	Important	Not Important	Important	Important	Highly Important	Important	Not Important	Important	Highly Important	Not Important	Important
62	2025-04-15 14:39:56	2025-04-15 14:54:21	English (United States)‎	Female	>49	More than 16 years	Social Sciences & Humanities	PhD	1-2 years	Free	12-17	Highly Important	Not Important	Slightly Important	Highly Important	Highly Important	Highly Important	Important	Not Important	Highly Important	Important	Highly Important	Important	Not Important	Important	Highly Important	Not Important	Important
63	2025-04-15 14:44:11	2025-04-15 14:56:32	English (United States)‎	Male	31-36	5-10 years	Arts & Design	Master’s	1-2 years	Paid	Less than 5	Important	Not Important	Slightly Important	Highly Important	Highly Important	Highly Important	Important	Not Important	Highly Important	Important	Highly Important	Important	Not Important	Important	Important	Not Important	Important
64	2025-04-15 16:27:49	2025-04-15 16:40:32	English (United States)‎	Male	37-42	11-16 years	Science, Technology, Engineering, and Mathematics	PhD	1-2 years	Paid	12-17	Highly Important	Not Important	Slightly Important	Highly Important	Highly Important	Highly Important	Highly Important	Not Important	Important	Important	Important	Important	Not Important	Important	Important	Not Important	Important
65	2025-04-15 16:30:58	2025-04-15 16:47:51	English (United States)‎	Female	25-30	Less than 5 years	Arts & Design	Master’s	1-2 years	Free	Less than 5	Highly Important	Slightly Important	Moderately Important	Highly Important	Highly Important	Highly Important	Highly Important	Slightly Important	Important	Important	Important	Important	Slightly Important	Important	Highly Important	Not Important	Important
66	2025-04-15 16:57:17	2025-04-15 17:11:04	English (United States)‎	Male	>49	More than 16 years	Science, Technology, Engineering, and Mathematics	PhD	More than 2 years	Free	Less than 5	Important	Important	Highly Important	Important	Highly Important	Important	Important	Moderately Important	Important	Moderately Important	Important	Highly Important	Moderately Important	Important	Important	Moderately Important	Highly Important
67	2025-04-15 17:34:28	2025-04-15 17:52:17	English (United States)‎	Male	43-48	More than 16 years	Social Sciences & Humanities	PhD	1-2 years	Free	12-17	Highly Important	Moderately Important	Not Important	Highly Important	Highly Important	Highly Important	Important	Slightly Important	Highly Important	Important	Highly Important	Important	Slightly Important	Important	Highly Important	Not Important	Highly Important
68	2025-04-15 19:28:59	2025-04-15 19:41:00	English (United States)‎	Female	37-42	11-16 years	Science, Technology, Engineering, and Mathematics	PhD	1-2 years	Paid	6-11	Important	Slightly Important	Slightly Important	Highly Important	Highly Important	Highly Important	Important	Not Important	Highly Important	Important	Important	Important	Slightly Important	Highly Important	Highly Important	Slightly Important	Important
69	2025-04-15 19:31:47	2025-04-15 19:46:20	English (United States)‎	Male	>49	More than 16 years	Science, Technology, Engineering, and Mathematics	PhD	More than 2 years	Paid	12-17	Important	Not Important	Slightly Important	Highly Important	Highly Important	Highly Important	Important	Slightly Important	Highly Important	Highly Important	Highly Important	Important	Not Important	Important	Highly Important	Slightly Important	Important
70	2025-04-16 09:53:17	2025-04-16 10:10:16	English (United States)‎	Female	43-48	11-16 years	Science, Technology, Engineering, and Mathematics	PhD	1-2 years	Free	6-11	Important	Moderately Important	Not Important	Important	Important	Highly Important	Important	Slightly Important	Important	Important	Important	Important	Slightly Important	Important	Important	Slightly Important	Important
71	2025-04-16 13:10:03	2025-04-16 13:29:14	English (United States)‎	Female	31-36	5-10 years	Arts & Design	Master’s	1-2 years	Paid	Less than 5	Important	Slightly Important	Slightly Important	Important	Important	Highly Important	Moderately Important	Not Important	Important	Moderately Important	Important	Important	Slightly Important	Important	Highly Important	Moderately Important	Important
72	2025-04-16 15:03:08	2025-04-16 15:22:28	English (United States)‎	Male	>49	More than 16 years	Science, Technology, Engineering, and Mathematics	PhD	More than 2 years	Paid	12-17	Important	Moderately Important	Moderately Important	Highly Important	Highly Important	Important	Moderately Important	Not Important	Important	Important	Highly Important	Important	Slightly Important	Important	Important	Slightly Important	Important
73	2025-04-16 18:18:24	2025-04-16 18:32:49	English (United States)‎	Female	43-48	11-16 years	Social Sciences & Humanities	PhD	1-2 years	Free	6-11	Important	Slightly Important	Moderately Important	Important	Highly Important	Important	Moderately Important	Slightly Important	Important	Important	Important	Important	Moderately Important	Highly Important	Highly Important	Moderately Important	Highly Important
74	2025-04-16 18:36:57	2025-04-16 18:53:56	English (United States)‎	Female	37-42	5-10 years	Arts & Design	Master’s	1-2 years	Free	6-11	Highly Important	Not Important	Not Important	Highly Important	Highly Important	Highly Important	Highly Important	Not Important	Highly Important	Highly Important	Highly Important	Highly Important	Slightly Important	Important	Highly Important	Not Important	Not Important
75	2025-04-16 20:00:17	2025-04-16 20:16:23	English (United States)‎	Male	31-36	5-10 years	Social Sciences & Humanities	Master’s	1-2 years	Free	6-11	Moderately Important	Slightly Important	Slightly Important	Highly Important	Important	Highly Important	Important	Slightly Important	Highly Important	Important	Highly Important	Moderately Important	Not Important	Important	Important	Not Important	Important
76	2025-04-16 20:16:50	2025-04-16 20:29:36	English (United States)‎	Female	31-36	5-10 years	Social Sciences & Humanities	Master’s	1-2 years	Free	Less than 5	Moderately Important	Slightly Important	Slightly Important	Important	Important	Important	Moderately Important	Slightly Important	Important	Important	Important	Important	Slightly Important	Important	Important	Moderately Important	Important
77	2025-04-16 20:36:36	2025-04-16 20:48:17	English (United States)‎	Male	25-30	Less than 5 years	Arts & Design	Master’s	Less than 1 year	Free	Less than 5	Important	Slightly Important	Moderately Important	Important	Important	Important	Moderately Important	Moderately Important	Important	Important	Moderately Important	Moderately Important	Moderately Important	Moderately Important	Important	Slightly Important	Moderately Important
78	2025-04-16 20:41:48	2025-04-16 20:54:34	English (United States)‎	Male	25-30	5-10 years	Social Sciences & Humanities	Bachelor's	1-2 years	Free	6-11	Important	Moderately Important	Moderately Important	Important	Important	Important	Moderately Important	Moderately Important	Important	Important	Moderately Important	Important	Slightly Important	Moderately Important	Moderately Important	Not Important	Highly Important
79	2025-04-17 11:34:36	2025-04-17 11:52:07	English (United States)‎	Male	37-42	11-16 years	Science, Technology, Engineering, and Mathematics	PhD	More than 2 years	Paid	6-11	Moderately Important	Moderately Important	Moderately Important	Important	Important	Moderately Important	Moderately Important	Moderately Important	Important	Moderately Important	Moderately Important	Not Important	Not Important	Moderately Important	Moderately Important	Slightly Important	Moderately Important
80	2025-04-17 11:51:15	2025-04-17 12:13:05	English (United States)‎	Male	31-36	5-10 years	Science, Technology, Engineering, and Mathematics	Master’s	1-2 years	Paid	6-11	Moderately Important	Slightly Important	Moderately Important	Important	Important	Important	Moderately Important	Slightly Important	Important	Important	Important	Moderately Important	Moderately Important	Important	Important	Moderately Important	Important
81	2025-04-17 17:02:29	2025-04-17 17:12:46	English (United States)‎	Female	37-42	11-16 years	Business	PhD	1-2 years	Paid	6-11	Moderately Important	Moderately Important	Moderately Important	Important	Important	Highly Important	Moderately Important	Slightly Important	Highly Important	Important	Important	Important	Moderately Important	Important	Important	Moderately Important	Important
82	2025-04-17 20:42:57	2025-04-17 20:57:32	English (United States)‎	Male	31-36	5-10 years	Science, Technology, Engineering, and Mathematics	Master’s	More than 2 years	Free	Less than 5	Moderately Important	Moderately Important	Important	Moderately Important	Moderately Important	Moderately Important	Moderately Important	Moderately Important	Important	Moderately Important	Highly Important	Moderately Important	Moderately Important	Important	Important	Moderately Important	Moderately Important
83	2025-04-17 19:30:54	2025-04-17 19:45:40	English (United States)‎	Female	37-42	11-16 years	Science, Technology, Engineering, and Mathematics	PhD	1-2 years	Paid	6-11	Moderately Important	Moderately Important	Important	Important	Important	Important	Important	Important	Moderately Important	Moderately Important	Important	Important	Moderately Important	Important	Important	Moderately Important	Important
84	2025-04-18 10:35:56	2025-04-18 10:56:55	English (United States)‎	Female	37-42	11-16 years	Social Sciences & Humanities	Master’s	More than 2 years	Paid	6-11	Important	Slightly Important	Slightly Important	Important	Important	Important	Important	Slightly Important	Highly Important	Important	Important	Important	Slightly Important	Important	Important	Moderately Important	Important
85	2025-04-18 11:54:12	2025-04-18 12:09:40	English (United States)‎	Female	37-42	More than 16 years	Business	Master’s	Less than 1 year	Free	Less than 5	Important	Important	Important	Highly Important	Important	Highly Important	Moderately Important	Highly Important	Moderately Important	Important	Important	Important	Slightly Important	Moderately Important	Moderately Important	Important	Highly Important
86	2025-04-18 14:23:13	2025-04-18 14:30:47	English (United States)‎	Male	>49	More than 16 years	Science, Technology, Engineering, and Mathematics	PhD	1-2 years	Paid	12-17	Important	Slightly Important	Slightly Important	Important	Important	Important	Important	Not Important	Important	Important	Important	Important	Slightly Important	Important	Important	Slightly Important	Important
87	2025-04-18 15:08:53	2025-04-18 15:19:26	English (United States)‎	Female	31-36	11-16 years	Business	Master’s	Less than 1 year	Free	Less than 5	Important	Moderately Important	Moderately Important	Highly Important	Important	Important	Highly Important	Moderately Important	Important	Moderately Important	Moderately Important	Moderately Important	Moderately Important	Moderately Important	Moderately Important	Moderately Important	Moderately Important
88	2025-04-18 19:49:21	2025-04-18 20:03:51	English (United States)‎	Male	25-30	Less than 5 years	Social Sciences & Humanities	Bachelor's	More than 2 years	Free	Less than 5	Important	Important	Important	Important	Important	Important	Important	Important	Important	Important	Important	Important	Important	Important	Important	Important	Important
89	2025-04-19 10:21:50	2025-04-19 10:36:44	English (United States)‎	Female	31-36	5-10 years	Science, Technology, Engineering, and Mathematics	Master’s	1-2 years	Free	Less than 5	Moderately Important	Moderately Important	Moderately Important	Moderately Important	Moderately Important	Moderately Important	Moderately Important	Moderately Important	Moderately Important	Moderately Important	Moderately Important	Moderately Important	Moderately Important	Moderately Important	Moderately Important	Moderately Important	Moderately Important
90	2025-04-19 21:53:10	2025-04-19 22:09:27	English (United States)‎	Female	25-30	Less than 5 years	Science, Technology, Engineering, and Mathematics	Master’s	1-2 years	Free	Less than 5	Important	Moderately Important	Moderately Important	Moderately Important	Moderately Important	Important	Moderately Important	Moderately Important	Moderately Important	Moderately Important	Moderately Important	Moderately Important	Moderately Important	Moderately Important	Moderately Important	Moderately Important	Moderately Important
91	2025-04-20 11:50:38	2025-04-20 12:02:46	English (United States)‎	Female	43-48	More than 16 years	Science, Technology, Engineering, and Mathematics	PhD	Less than 1 year	Free	More than 17	Important	Moderately Important	Moderately Important	Important	Moderately Important	Important	Moderately Important	Slightly Important	Important	Moderately Important	Important	Moderately Important	Moderately Important	Highly Important	Highly Important	Moderately Important	Important
92	2025-04-20 15:23:56	2025-04-20 15:31:38	English (United States)‎	Male	37-42	5-10 years	Social Sciences & Humanities	Master’s	1-2 years	Free	6-11	Important	Moderately Important	Moderately Important	Important	Moderately Important	Moderately Important	Moderately Important	Moderately Important	Moderately Important	Moderately Important	Moderately Important	Moderately Important	Slightly Important	Important	Moderately Important	Moderately Important	Moderately Important
